# Supplementary material for: Validity and Reliability of Farsi Version of Youth Sport Environment Questionnaire
Source: Hindawi journal article supplement (doi:10.1155/2015/985283), 2015-01-01
Supplement: f1 [file 985283.f1.pdf]

**Supplemental material:** Example items from the Youth Sport Environment Questionnaire

| Questions                                                | Strongly disagree----- Strongly agree |   |   |   |   |   |   |   |   |
|----------------------------------------------------------|---------------------------------------|---|---|---|---|---|---|---|---|
| 1. We all share the same commitment to our team's goals. | 1                                     | 2 | 3 | 4 | 5 | 6 | 7 | 8 | 9 |
| 2. I invite my teammates to do things with me.           | 1                                     | 2 | 3 | 4 | 5 | 6 | 7 | 8 | 9 |
| 3. As a team, we are all on the same page.               | 1                                     | 2 | 3 | 4 | 5 | 6 | 7 | 8 | 9 |
| 4. Some of my best friends are in this team.             | 1                                     | 2 | 3 | 4 | 5 | 6 | 7 | 8 | 9 |
| 5. I like the way we work together as a team.            | 1                                     | 2 | 3 | 4 | 5 | 6 | 7 | 8 | 9 |
| 6. I do not get along with the members of my team.       | 1                                     | 2 | 3 | 4 | 5 | 6 | 7 | 8 | 9 |
